# Genome-Wide Classification of Type I, Type II and Type III Interferon-Stimulated Genes in Chicken Fibroblasts

Diwakar Santhakumar<sup>1</sup>, Mohammed A. Rohaim<sup>1</sup> and Muhammad Munir<sup>1,\*</sup>

<sup>1</sup>Division of Biomedical and Life Sciences, Faculty of Health and Medicine, Lancaster University, Lancaster, LA1 4YG, UK; [d.santhakumar@lancaster.ac.uk](mailto:d.santhakumar@lancaster.ac.uk); [m.a.rohaim@lancaster.ac.uk](mailto:m.a.rohaim@lancaster.ac.uk); [muhammad.munir@lancaster.ac.uk](mailto:muhammad.munir@lancaster.ac.uk)

\*Correspondence: [\\*muhammad.munir@lancaster.ac.uk](mailto:muhammad.munir@lancaster.ac.uk); Tel.: +441524595083

**Abstract:** Interferons (IFNs) play central roles in establishing innate immunity and mediating adaptive immunity against multiple pathogens. Three known types of IFNs identify their cognate receptors, initiate cascades of signalling events and eventually result in the induction of myriad of IFN-stimulated genes (ISGs). These ISGs perform multitude of functions and cumulatively corroborate a bespoke antiviral state to safeguard hosts against invading viruses. Owing to unique nature of chicken's immune system and lack of foundational profiling information on the nature and dynamic expression of IFN-specific ISGs at the genome scale, we performed a systematic and extensive analysis of type I, II and III IFN-induced genes in chicken. Employing pan-IFN responsive chicken fibroblasts coupled with transcriptomics we observed an overwhelming over-representation of up-regulated ISGs by all types of IFNs. Intriguingly, prediction of IFN-stimulated response element (ISRE) and gamma-IFN activation sequence (GAS) revealed a substantial number of GAS motifs in selective significantly induced ISGs in chicken. Extensive comparative, genome-wide and differential expression analysis of ISGs under equivalent signalling input catalogue a set of genes that were either IFN-specific or independent of types of IFNs used to prime fibroblasts. These comprehensive datasets, first of their kinds in chicken, will establish foundations to elucidate the mechanisms of actions and breadth of antiviral action of ISGs which may propose alternative avenues for the targeted antiviral therapy against viruses of poultry and public health importance.

**Keywords:** interferons; chicken; birds: innate immunity; ISGs; IFN regulated genes; immunity

---

## 38 1. Introduction

39 Innate immunity defines the first line of host defense, and interferons (IFNs) play central roles in  
40 mediating host resistance against viruses, bacteria, fungi and parasites by directly and indirectly  
41 regulating multiple immune cells [1]. IFNs are part of the class II cytokine family and are divided into  
42 three types (I, II and III) based on their receptor specificity, sequence homology, evolutionary  
43 relatedness, functional activity of these cytokines and nature of interferon-stimulated genes (ISGs)  
44 induction [2,3]. The ISGs display a spectrum of cellular functions and the cumulative actions of these  
45 ISGs define the antiviral state of the hosts.

46  
47 Amongst all IFNs, type I IFNs were first identified, most studied, are diverse and potent antiviral  
48 cytokines. Compared to multiple IFNs in human, only two well-characterized type I IFNs (IFN- $\alpha$  and  
49 IFN- $\beta$ ) are reported in chicken and we have recently identified a third novel chicken type I IFN  
50 (IFN- $\kappa$ ) that carried antiviral activities both *in vitro* and *in ovo* [4]. While all type I IFNs are structurally  
51 diverse, they bind to the same heterodimeric receptor complex composed of one chain of the IFN- $\alpha$   
52 receptor 1 (IFNAR1) and one chain of the IFN- $\alpha$  receptor 2 (IFNAR2). In contrast, type II IFN,  
53 constituted of single gene encoding IFN- $\gamma$ , interacts with receptors complexes of IFN $\gamma$ R1 and  
54 IFN $\gamma$ R2 and play pleiotropic roles in regulating the maturation and differentiation process of several  
55 immune cells and activating T helper 1-type immune responses [5]. More recently identified class of  
56 IFNs are type III IFNs or IL-28/29 which are encoded by a single gene of IFN- $\lambda$  in chicken compared  
57 to four genes in human [4]. The type III IFN interacts with heterodimeric receptor complex of IL-28R $\alpha$   
58 and IL-10R $\beta$ , which are predominantly expressed on the epithelial cells of the host.

59  
60 Upon binding to their cognate receptors, all types of IFNs initiate a cascade of intracellular events  
61 that culminate in the induction of several hundreds genes; however each type of IFN carries a certain  
62 level of distinction [4]. In spite of type I and III IFNs are sharing many properties, recent discoveries  
63 have revealed context-specific functional differences [6]. It has been shown that type I and III IFNs in  
64 mammals initiate the same signalling pathway through phosphorylation of Signal transducer and  
65 activator of transcription 1 (STAT1) and STAT2 heterodimers possibly by tyrosine kinase 2 (TYK2)  
66 and Janus Kinase 1 (JAK1). However, type II IFN triggers this pathway via the activation of STAT1  
67 homodimers mediated by JAK1 and JAK2 kinases [4].

68  
69 Mammalian type I and type III IFNs signal through the JAK-STAT pathway to activate the  
70 heterotrimeric interferon-stimulated gene factor 3 (ISGF3) complex, comprised of phosphorylated  
71 STAT1 and STAT2, and interferon regulatory factor 9 (IRF9) [7,8] (yet to be identified in chickens). In  
72 contrast, type II IFNs initiate the formation of a STAT1–STAT1 homodimer to assemble GAF, without  
73 the need of IRF9. Upon nuclear translocation, ISGF3 and gamma-interferon activation factor (GAF)  
74 bind to IFN-stimulated response elements (ISREs) [6] or gamma-IFN activation sequence (GAS)  
75 motifs, respectively<sup>7</sup> leading to the transcriptional activation of hundreds of ISGs which encode  
76 proteins that act via a variety of mechanisms to restrict viral infection [9-11].

77  
78 It has been demonstrated that JAK-STAT pathway initiates transcriptional regulation of a string of  
79 cytokines, chemokine, antimicrobial products and regulators of apoptotic pathways [2,7]. In  
80 mammals, a range of genome scale transcriptomics screening approaches has been applied to map

81 the diversity, kinetics and expression patterns of these antiviral factors. Based on these data, recent  
82 studies have applied large-scale screening platforms to elucidate functional importance of these  
83 ISGs regulated by IFN- $\alpha$ , IFN- $\lambda$  and IFN- $\gamma$  [10,11]. However, primary focus of these studies was  
84 restricted to type I and type II IFNs whereas growing evidences are highlighting the crucial roles of  
85 IFN- $\lambda$  (type III IFN) in establishing antiviral state. Recently, it has been demonstrated that paracrine  
86 singling of IFN- $\lambda$  is fundamental in early innate immune responses and to inhibit influenza virus  
87 spread [12], which pose enormous zoonotic (e.g. H7N9, H5N1, H9N2 and H5N2) threats to public  
88 health and remains the most economically devastating disease in the poultry [13].

89

90 Most of our understandings on ISGs-mediated antiviral functions in chicken are driven from human  
91 and other mammalian studies. Given the fact that chicken differs fundamentally from other mammals  
92 in innate immunity, majority of current concepts are mainly based on assumptions. Some out of  
93 many examples include absence of RIG-I, IRF9 and IRF3 homologues, lack of anti-viral roles of  
94 chicken Mx, absence of many essential molecules in the innate immune signalling pathways such as  
95 IFIT1/2/3, shorter versions of ZC3HAV1 and many of the DNA sensors [2,3]. Intriguingly, despite the  
96 absence of these key components, chickens respond to highly pathogenic avian influenza (HPAIVs)  
97 and other viruses, and mount potent type I IFN responses [14-16] highlighting the presence of yet  
98 unknown and evolutionary compensatory mechanisms in chicken.

99

100 Given the lack of comprehensive data on the nature of type I, II and type III IFN-mediated antiviral  
101 profiling, uniqueness of the chicken as model system, and being an important poultry species,  
102 studies have started to catalogue IFN-induced and IFN-regulated genes in chicken [17,18].  
103 However, these studies have exclusively identified expression dynamics of ISGs induced by type I  
104 IFNs and nature and regulation of type II and type III mediated ISGs are required to be explored in  
105 chicken at genome-wide scale. Additionally, a side-by-side comparison of the type I, II, and III  
106 IFN-driven host cell transcriptomes has not been reported so far in chicken. Therefore, in order to lay  
107 foundation for future research on functional annotation of ISGs, we performed intensive gene  
108 expression analysis in pan-IFN responsive chicken fibroblasts and provide a comprehensive and  
109 comparative data on the chicken ISGs stimulated with type I, II and III IFNs. This data will help to  
110 facilitate underpinning the comparative studies with human ISGs and to stimulate large-scale  
111 functional screens as has been performed in mammals [10].

## 112 **2. Materials and Methods**

### 113 *2.1. Cells culture and media.*

114 Immortalized chicken fibroblasts (DF-1) and human embryonic kidney cells 293T (HEK-293T) cells  
115 were maintained in Dulbecco's modified eagle medium (DMEM) (Gibco, Carlsbad, CA, USA)  
116 supplemented with 10% foetal bovine serum (FBS), 1% penicillin and streptomycin (P/S) at 37 °C in  
117 5% CO<sub>2</sub> incubator.

118

### 119 *2.2. Production of Interferons*

120 The open reading frame (ORF) sequences for chIFN- $\alpha$ , chIFN- $\gamma$  and chIFN- $\lambda$  were synthesized  
121 (GeneArt, Thermo, UK) and cloned into the pcDNA3.1+ vector. The pcDNA3.1+ encoding chIFN- $\alpha$ ,  
122 chIFN- $\gamma$  and-chIFN- $\lambda$  plasmids were transfected into HEK-293T cells using the Lipofectamine 2000  
123 Transfection Reagent (Invitrogen). Supernatants were collected at 48 h and 72 h post-transfection,

124 then were cleared by centrifugation (1500 rpm for 5 min) and pooled and quantified using  
125 IFN-bioassay.

126

### 127 *2.3. IFN bioassay*

128 IFN-induced protection against VSV-GFP was used to identify IFN-producing stable clones  
129 (chIL28RA) and to quantify IFN preparations, as described before [19] and we reported earlier [3].  
130 Briefly, DF-1 cells were seeded in 96-well plates until they are 90% confluent and treated with serial  
131 dilutions of supernatants containing interferons for 24 hours. These interferon-stimulated cells were  
132 infected with VSV-GFP (MOI of 0.1). After 24 hours post-infection, VSV-GFP replication was  
133 correlated with the change in GFP fluorescence signal intensities using Luminometer (Promega,  
134 Madison, WI, USA). The percentage antiviral activities of IFNs were determined by comparing the  
135 percentage reduction of corrected GFP signal intensity (GFP signal intensity of IFN treated and virus  
136 infected wells minus background fluorescence signal intensity of uninfected control) with the  
137 mock-treated and VSV-GFP-infected control wells. One unit (U) of IFN in the tested IFN preparations  
138 was defined as the volume containing 50% inhibitory activity against VSV-GFP. A total of 1000 UI of  
139 IFNs were used for stimulation of chIL28RA DF-1 cells.

140

### 141 *2.4. Library preparation for mRNA sequencing*

142 Total RNA was extracted from IFN-primed or mock treated chIL28RA DF-1 cells in duplicate for  
143 RNA-sequencing using the TRIzol reagent (Invitrogen, USA). Approximately 2.5 µg of RNA per  
144 sample was used as input material while the mRNA was enriched by Oligo (dT) beads and then split  
145 into short fragments using fragmentation buffer (Thermo) that were then reverse transcribed into  
146 cDNA using random primers. Second-strand cDNA was synthesized by DNA polymerase I, RNase  
147 H, and dNTP. The cDNA fragments were then purified using the QiaQuick PCR extraction kit, poly(A)  
148 tails were added, and the ends were repaired and ligated to Illumina sequencing adapters. The  
149 ligation products were size selected by agarose gel electrophoresis, PCR amplified, and were then  
150 sequenced using the Illumina HiSeq in 2x150bp configuration by Genewiz Co. (New York, USA).

151

### 152 *2.5. RNA-Seq data analysis*

153 Sequence reads were trimmed to remove possible adapter sequences and nucleotides with poor  
154 quality using Trimmomatic v.0.36 [20]. The reads were then mapped to the chicken reference  
155 genome available on ENSEMBL using the STAR aligner [21]. The RNA-seq aligner was executed  
156 using a splice aligner, which detects splice junctions and incorporating them to help align the entire  
157 read sequences which generate BAM files. Unique exon hit counts were calculated using feature  
158 counts from the Subread package. After mapping and total gene hit counts calculation, the total gene  
159 hit counts table was used for downstream differential expression analysis using EdgeR [22]  
160 (<http://www.rproject.org/>). Expression values from each sample were carried out to estimate the  
161 sample distances. Shorter the distance, more closely related the samples are which used to identify  
162 if the two groups are closely related or not. Volcano plot analysis used to show the global  
163 transcriptional change across the groups [23].

164 Gene ontology analysis was conducted using GeneSCF [24]. Significant genes (absolute Log2 Fold  
165 Change, FC, >2) were first annotated with the Gene Ontology Biological Process information from  
166 the “goa\_chicken” database. Then Fisher’s exact test was conducted on each ontology. A list

167 containing statistics of over- or under-representation of GO Biological Processes relative to the  
168 unfiltered gene list was generated for each comparison and included as a deliverable. After mapping  
169 and total transcript hit counts calculation, the total transcript hit counts table was used for  
170 downstream differential expression analysis using DEXSeq [25]. To estimate the expression levels  
171 of alternatively spliced transcripts, the splice variant hit counts were extracted from the RNA-seq  
172 reads mapped to the genome. Differentially spliced genes were identified by testing for significant  
173 differences in read counts on exons (and junctions) of the genes using DEXSeq with an adjusted p  
174 value of 0.05.

175

#### 176 *2.6. Quantitative Reverse Transcription-PCR and Cytokine Expression*

177 Total RNA was extracted from chIFN- $\alpha$ , chIFN- $\beta$  and chIFN- $\lambda$  (1000 UI) stimulated chIL28RA DF-1  
178 cells using TRIzol reagents (Invitrogen, Carlsbad, CA, USA). Quantity and purity of extracted RNA  
179 was determined with a NanoDrop 1000 (PEQLAB Biotechnologie GMBH, Erlangen, Germany), while  
180 the RNA quality was analysed using a 2100 Bioanalyzer® (Agilent Technologies, Böblingen,  
181 Germany). A total of 200 ng of RNA was used in PCR reactions using SuperScript® III Platinum®  
182 SYBR® Green One-Step qRT-PCR Kit (Invitrogen, Carlsbad, CA, USA). The abundance of specific  
183 ISG mRNA was compared to the 28S rRNA in the Applied Biosystems Prism 7500 system. The  
184 reaction was carried out in ABI 7500 light cycler using the following thermo profile; 50 °C for  
185 5minutes hold, 95 °C for 2minutes hold, followed by 40 cycles of 95 °C for 3 seconds and 60 °C for  
186 30 seconds. Melting curve was determined at 95 °C for 15 seconds, 60 °C for 1minute, 95 °C for 15  
187 seconds and 60 °C for 15 seconds.

188

#### 189 *2.7. Prediction of ISREs and GAS elements and Promotor analysis*

190 In order to investigate if the significantly induced ISGs by the chicken type I, II, and III carry ISRE and  
191 GAS elements in their promoter regions, we scanned the 4 kb upstream promoter regions according  
192 to the approach described before [18,26,27]. Screening was performed based on Ensembl ID of  
193 most up-regulated genes for the GAS and ISRE using a Shell Script (kindly provided by Thomas  
194 Lütteke, Germany) [26].

195

#### 196 *2.8. Luciferase reporter assays*

197 To determine responsiveness of chicken ISRE and GAS to chicken chIFN- $\alpha$ , chIFN- $\gamma$  or chIFN- $\lambda$ ,  
198 chIL28RA DF-1 cells were grown in 96-well plate format at  $2 \times 10^4$  to  $4 \times 10^4$  cells/well and were  
199 co-transfected with 10 ng/well of a plasmid constitutively expressing Renilla luciferase (phRL-SV40;  
200 Promega, Madison, WI, USA) and 150 ng/well of full length pchMx or pchIFIT5 constructs. The  
201 pGL3.1 basic vector was used as a negative control. All transfections were performed using  
202 Lipofectamine 2000 and luciferase reporter assays were performed on the monolayers of chIL28RA  
203 DF-1 cells according to the manufacturer's protocol. At 24 h post-transfection, the transfected DF1  
204 cells were stimulated with chIFN- $\alpha$ , chIFN- $\gamma$ , and chIFN- $\lambda$  then lysed using 20 $\mu$ l 1 $\times$  passive lysis  
205 buffer (Promega, Madison, WI, USA) at 6 h post IFN treatment, and samples were assayed for  
206 Firefly and Renilla luciferase activities using the Dual-Luciferase Reporter Assay System by  
207 following supplier's instructions.

208

#### 209 *2.9. Statistical analyses*

210 Pairwise comparisons of treated and control groups were performed using Student's *t*-test. All  
211 statistical analysis and figures were conducted in the GraphPad Prism (GraphPad Software, La  
212 Jolla, CA, USA).

### 213 **3. Results**

#### 214 *3.1. Establishment of a Model Stable Chicken Cell Line Responsive to Type I, II and III IFNs*

215 The aim of the present study was to reveal a complete picture of the antiviral type I, II and  
216 III-responsive genes in chicken fibroblasts. To elucidate the overall antiviral potency and the  
217 unimpeded ability of chicken IFNs to establish an antiviral system, we expressed chIFN- $\alpha$ , chIFN- $\lambda$   
218 and chIFN- $\gamma$  in the heterologous mammalian (HEK 293T) cells as we described before for the  
219 chIFN- $\beta$  and chIFN- $\kappa$  [3,4]. The biological activities and responses of chicken embryo fibroblasts to  
220 these cytokines were assessed using highly sensitive and IFN-activated chMx promoter [3,26]. The  
221 chMx promoter carries *cis-acting* regulatory elements including GAS and ISRE, which are  
222 fundamental for regulation of the pan-IFN mediated transcriptional initiation.

223

224 Using chMx promoter-based reporter system, fold induction of downstream luciferase gene was  
225 measured under chIFN- $\alpha$ , chIFN- $\lambda$  and chIFN- $\gamma$  stimulation and compared to mock-treated control.  
226 The recombinant chIFN- $\alpha$  and chIFN- $\gamma$  induced as high as 19 and 14 folds luciferase activities,  
227 respectively. Intriguingly, chIFN- $\lambda$  activated a weaker chMx promoter activity in established chicken  
228 fibroblasts (Figure 1A). Since all three types of IFNs activate JAK-STAT pathway in a  
229 receptor-specific manner, it has been revealed that DF-1 cell line showed suppressed expression of  
230 chIL28R $\alpha$  receptor [28], which led to attenuated promoter activities. Moreover, we demonstrated a  
231 suppressive response of DF1 against chIFN- $\lambda$  in an IFN-bioassay. When wild type DF-1 cells were  
232 stimulated with chIFN- $\alpha$  and chIFN- $\gamma$ , a substantial inhibition in the replication of an IFN-sensitive  
233 VSV-GFP virus was observed in a dose dependent manner (Figure 1B). In contrast, these cells  
234 failed to inhibit the replication kinetics of VSV-GFP, further confirming the suppressive expression of  
235 cognate receptors for chIFN- $\lambda$ .

236

**Fig. 1**

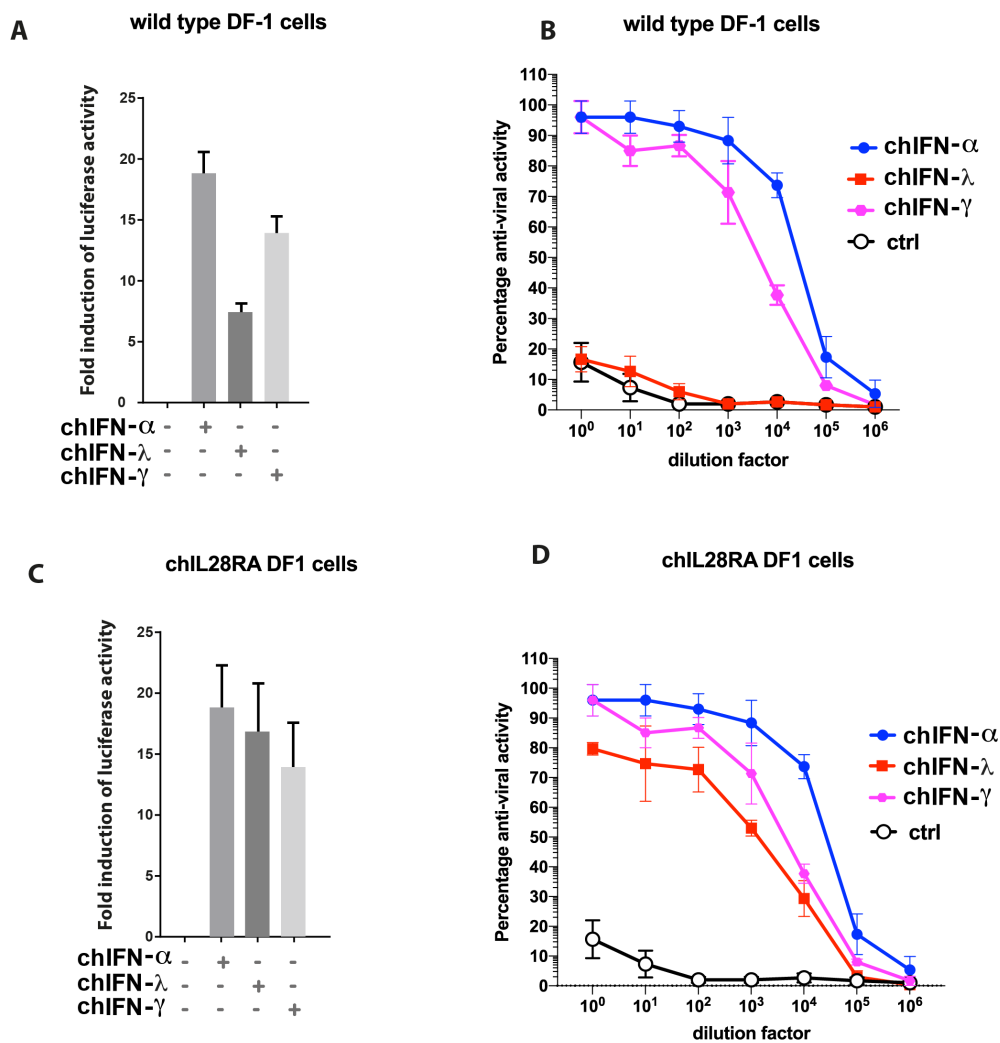

237  
238

239 **Figure 1.** Responsiveness of chIL28RA DF-1 cells to type chicken I, II and III IFNs. Wild type (A) or chIL28RA  
240 DF-1 cells (C) were transfected with plasmid encoding luciferase genes downstream to chMx promoter and  
241 stimulated with chIFN- $\alpha$ , chIFN- $\gamma$  or chIFN- $\lambda$  for 24 hours before lysis and measuring the luciferase activities.  
242 Fold induction was calculated compared to mock-stimulated control. Wild type (B) or chIL28RA DF-1 cells (D)  
243 were treated with increasing concentration of chIFN- $\alpha$ , chIFN- $\gamma$  or chIFN- $\lambda$  for 24 hours followed by infection  
244 with the VSV-GFP for 24 hours. The level of expression of GFP was measured and plotted. The data represent  
245 three independent experiments performed in triplicate.

246

247 In order to demonstrate the supplementation of chIL28R $\alpha$  can reconstitute the functional  
248 abnormalities, we used a stable DF1 cell line, which constitutively expressed chIL28R $\alpha$  receptors  
249 (named as chIL28RA DF1). Stimulation of these cells with chIFN- $\lambda$  profoundly activated the chMx  
250 promoter activities at the level that was comparable to chIFN- $\alpha$  and chIFN- $\gamma$  (Figure 1C). Moreover,  
251 the chIFN- $\lambda$  substantially inhibited the replication of VSV-GFP in stable chIL28RA DF1 cells. While  
252 the level of virus inhibition was lower than chIFN- $\alpha$  and chIFN- $\gamma$ , comparative to wild type DF1, a  
253 considerable improvement was observed (Figure 1D). These results demonstrate that chIL28RA  
254 DF1 cell line is an improved system to quantify all types of IFNs, possesses a functional IFN system,

255 and is a suitable model cell line to map the nature and dynamics of ISGs induced by all type I, II and  
256 III IFNs. Therefore, this stable cell line was used for chicken transcriptomes throughout the study.

257

### 258 *3.2. Experimental Outline to Measure Chicken Transcriptomes*

259 The recombinant chIFN- $\alpha$ , chIFN- $\lambda$  and chIFN- $\gamma$  were quantified in a VSV-GFP based IFN-bioassay  
260 as we described before [3] and were diluted to a final concentration of 1000 UI/ml. The chIL28RA  
261 DF1 cell line, primed with recombinant chIFN- $\alpha$  or chIFN- $\lambda$  or chIFN- $\gamma$  or mock-treated with PBS for  
262 24 hours, were subjected to RNA extraction. As an internal quality control, the transcription of mRNA  
263 for the chIFIT5 was quantified (data not shown) and samples that showed a significant induction of  
264 chIFIT5 were indicative of IFN-mediated stimulation of the gene [3]. The RNA sequencing was  
265 applied to investigate genes that are specifically or commonly induced by chicken type I, II and III  
266 IFNs (Supplementary Figure 1). A total of eight cDNA libraries, constructed from total RNA from  
267 IFN-stimulated chIL28RA DF1 cell, generated a total of 198,134,047 clean reads. These finished  
268 reads were mapped onto the chicken reference genome with an assembly rate of individual library  
269 ranged from 88.99% - 89.42%.

270

### 271 *3.3. Comparative Characterization of ISGs Induced by Type I and Type III IFNs*

272 Both type I (chIFN- $\alpha$ ) and type III (chIFN- $\lambda$ ) IFNs bind to their specific receptors; however, they  
273 initiate the same downstream IFN-signalling pathways and culminate in the transcriptional activation  
274 of ISGs. The receptors for type I IFNs are ubiquitously expressed in majority of nucleated cells  
275 whereas the receptors for type III IFNs are more consolidated on epithelial cells. In order to  
276 investigate the nature of ISGs induced by specific types of IFN, we individually stimulated the  
277 established cells line and mapped the transcription of ISGs using transcriptomes.

278

279 Compared to the mock-treated chIL28RA DF1 cell, the chIFN- $\alpha$  stimulated a total of 111 genes and  
280 suppressed 29 genes whereas chIFN- $\lambda$  up-regulated 115 and down regulated four genes (Figure 2A,  
281 Supplementary table). Using comparative fold induction criteria between chIFN- $\alpha$  and chIFN- $\lambda$ ,  
282 among genes that were differential expressed and mapped to the chicken genome, a total of 29  
283 genes were observed to be chIFN $\alpha$ -specific whereas 60 were chIFN- $\lambda$ -specific (Figure 2B). In order  
284 to understand the plasticity of chIFN- $\alpha$  and chIFN- $\lambda$  in inducing specific set of ISGs, the comparative  
285 scatter plot analysis indicated that majority of the up-regulated as well as down-regulated genes  
286 were shared between type I and type III IFNs (Figure 2C) and thus represented a linear expression  
287 pattern. Next, we applied pairwise cluster plotting and noticed, as was observed in comparative dot  
288 plot, that genetics and nature of up- and down-regulated genes induced by chIFN- $\alpha$  and chIFN- $\lambda$   
289 were primarily aligned at both ends (Figure 2D). This distance matrix based pairing of IFN-regulated  
290 genes further confirms the linearity of the expression and highlighted the communal IFN-signalling  
291 pathways involved in response to type I and type III IFNs.



Fig. 2

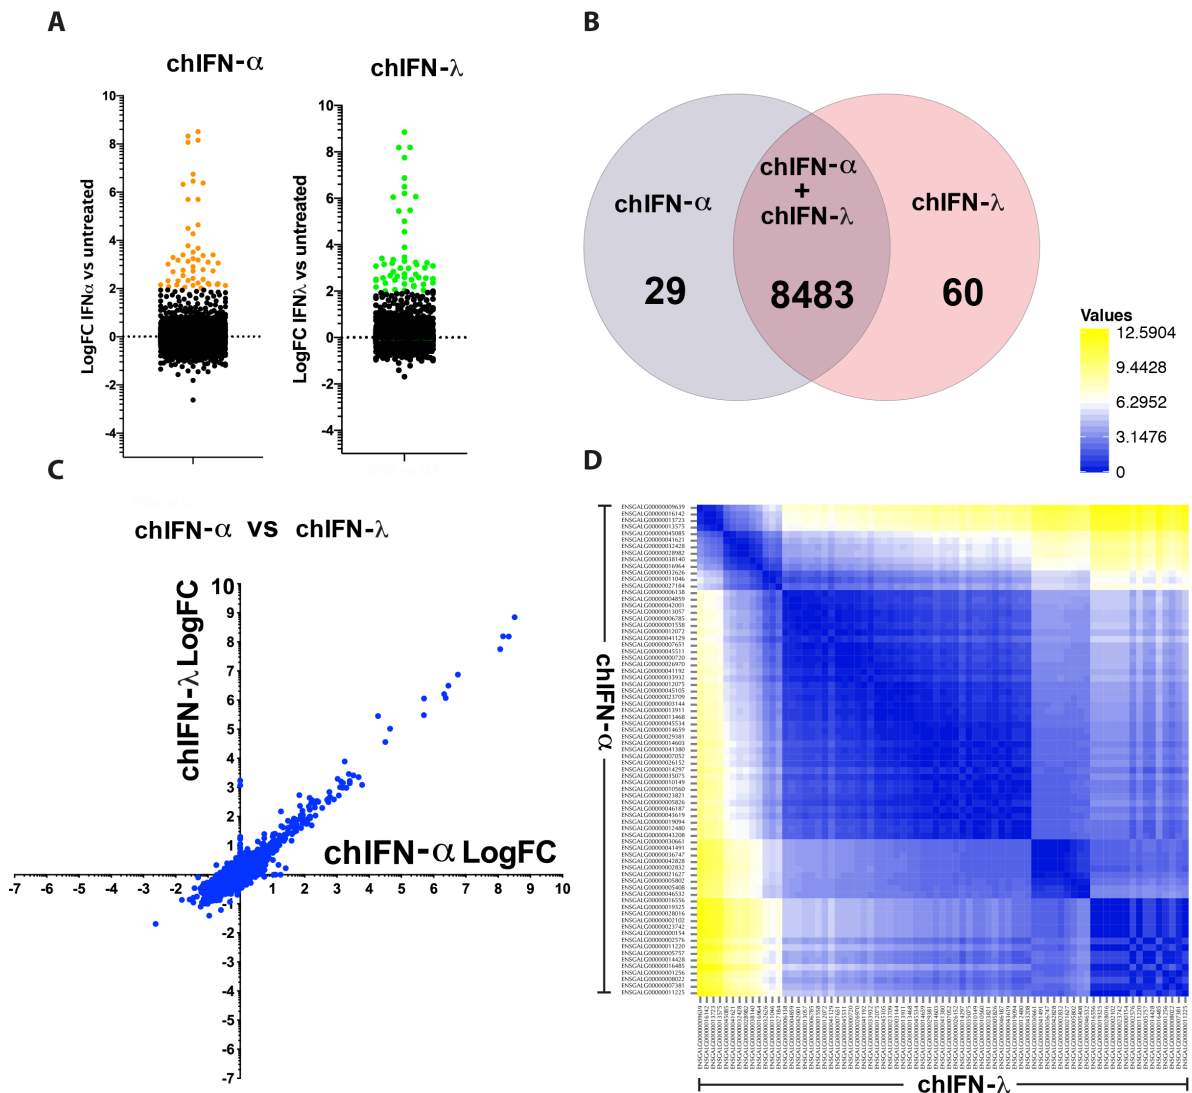

292

293

294

295

296

297

298

299

300

301

302

303

304

305

306

307

**Figure 2.** Expression patterns of type I and III IFN-regulated genes in chIL28RA DF1 cell line. (A) A number of ISGs were up-regulated and down-regulated by chIFN- $\alpha$  or chIFN- $\lambda$ . Only significantly expressed genes with LogFC > 2 compared to control are coloured green (B) Direct comparison of ISGs between both type I and type III IFNs revealed a regulation of common 8483 genes, and 29 and 60 specific to chIFN- $\alpha$  or chIFN- $\lambda$ , respectively. (C) The dot plot representing the common and differential analysis of genes induced by chIFN- $\alpha$  or chIFN- $\lambda$ . (D) Pairwise comparison of the genetic diversity of ISGs induced by type I and type III IFNs indicating a higher level of similarity between genes induced by chIFN- $\alpha$  or chIFN- $\lambda$ .

### 3.4. Characteristic Induction of ISGs by Chicken Type I and Type II IFNs

Type I IFNs are encoded by multiple genes, however, there is only a single gene that translates into type II IFN (e.g. chIFN- $\gamma$ ). While type I IFN expression and functions are ubiquitous, the roles of type II IFNs are primarily restricted to the immune cells. Using a cell line that respond effectively to type I and type II IFNs, we mapped the nature and expression patterns of ISGs in chicken fibroblasts. Genes that were mapped to the chicken genome in chIFN- $\alpha$  and chIFN- $\gamma$ -primed chIL28RA DF1 cell were 8449 and 8468, respectively (Supplementary table 1). Amongst these genes, a total of 110

308 were up-regulated and 36 were down-regulated by chIFN- $\gamma$  in contrast to chIFN $\alpha$ -mediated  
 309 up-regulation of 111 and down-regulation of 29 genes (Figure 3A, Supplementary table 1). The  
 310 number of differentially regulated genes was comparable between chIFN- $\alpha$  and chIFN- $\gamma$ -stimulated  
 311 chicken fibroblasts, however, their nature and level of expression varied significantly. Direct  
 312 comparison of genes between both type I and type II IFNs revealed a regulation of common 8448  
 313 genes, and 64 and 66 were specific to chIFN- $\alpha$  and chIFN- $\gamma$ , respectively (Figure 3B).  
 314

Fig. 3

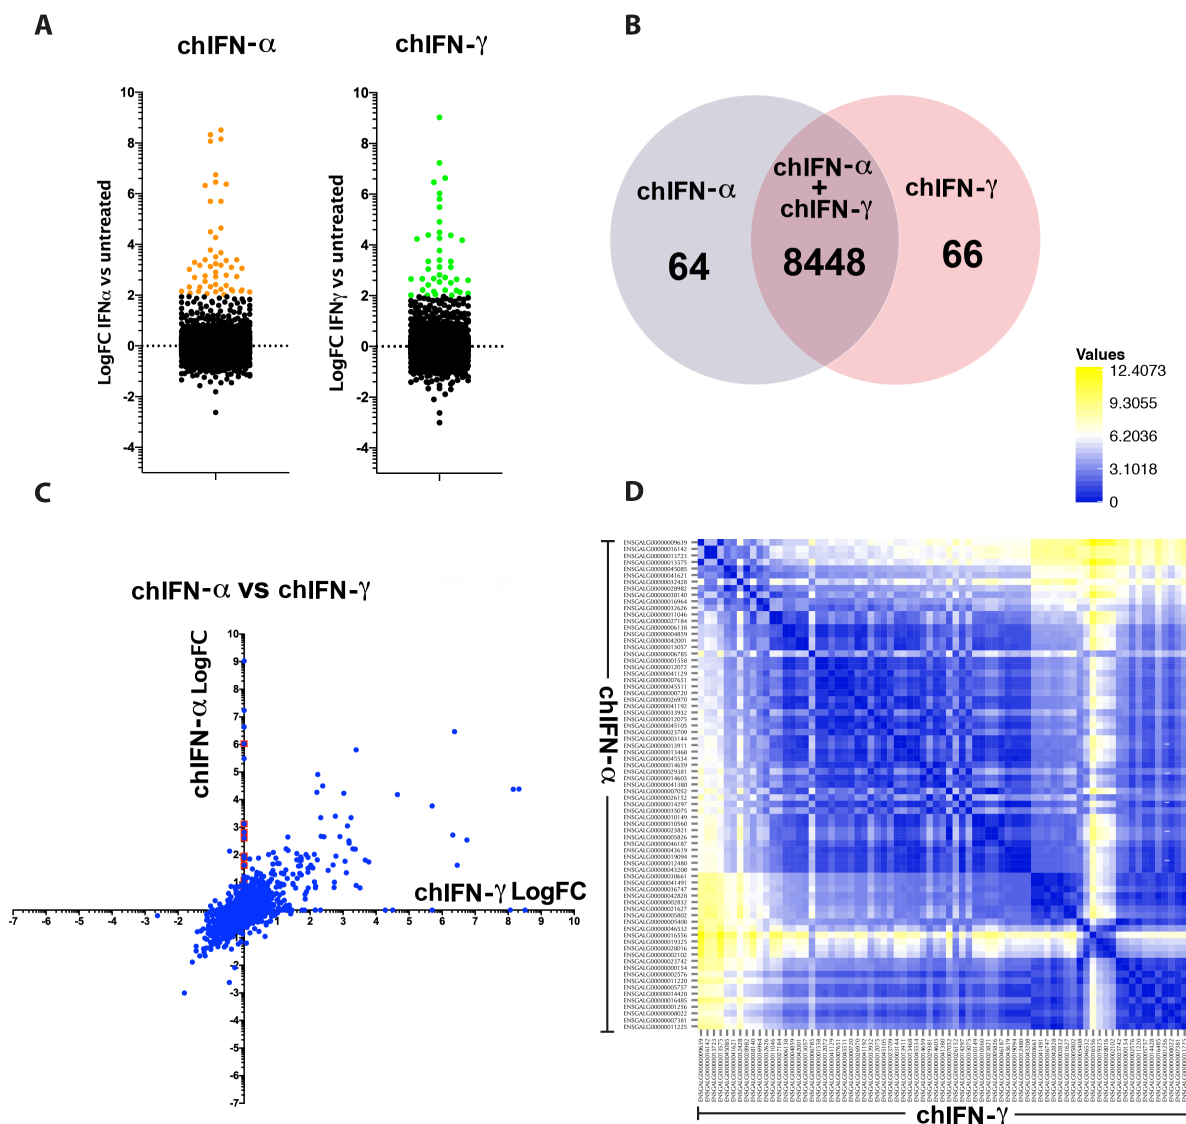

315  
 316 **Figure 3.** Diversity in the expression of type I and type II IFN-induced genes. (A) The dot plot shows the number  
 317 of genes that we differentially regulated (up or down) by chIFN- $\alpha$  or chIFN- $\gamma$  in chicken fibroblasts. Genes that  
 318 are significantly up-regulated were marked green. (B) The Venn chart shows the number of genes induced by  
 319 chIFN- $\alpha$  or chIFN- $\gamma$  individually or mutually. (C) The scatter dot plot depicting the diversity in the expression of  
 320 ISGs upon direct comparison between genes induced by chIFN- $\alpha$  or chIFN- $\gamma$ . (D) Pairwise comparison of the  
 321 significantly expressed genes between chIFN- $\alpha$  or chIFN- $\gamma$  primed chicken fibroblasts. Genes with similar  
 322 expression are coloured identical in the inter-section.

323

324 In order to map the diversity of these genes, we plotted them against the fold of induction of a gene  
325 by chIFN- $\alpha$  and compared it with the corresponding induction by chIFN- $\gamma$  (Figure 3C). This direct  
326 comparison demonstrated the diversity patterns of ISGs. In contrast to comparison of ISGs induced  
327 by chIFN- $\alpha$  and chIFN- $\lambda$ , a broader diversity of induction was observed between genes stimulated by  
328 chIFN- $\alpha$  and chIFN- $\gamma$ . The pairwise comparison further displayed the genetic diversity of ISGs  
329 induced by type I and type II IFNs (Figure 3D). Altogether, these data demonstrate that differential  
330 interaction of type I and type II IFNs to their cognate receptors and induction of distinctive JAK-STAT  
331 mediated cascades led to a differential and characteristic pattern of ISGs by these IFNs.

332

### 333 *3.5. Comparative Induction of ISGs by Type II and Type III IFNs*

334 The receptors for the type II IFNs are predominantly expressed in majority of immune cells whereas  
335 receptors for type III IFNs are expressed in epithelial cells. While individual genes have been  
336 identified that are inducible by these cytokines, the global picture especially in cell lines to effectively  
337 respond to all analysed IFNs remained elusive. We observed a comparable number of genes up or  
338 down-regulated by chIFN- $\lambda$  and chIFN- $\gamma$  (Figure 4A). However, the genes were of diverse  
339 functionality and represented a range of signalling pathways, predominantly represented by ISGs  
340 (Figure 4A, Supplementary table). A total of 58 genes were significantly and differentially regulated  
341 by chIFN $\gamma$  compared to 87 genes induced by chIFN- $\lambda$ . Both IFNs, shared a great number of genes  
342 that were expressed and mapped to the annotated genome of the chicken (Figure 4B). While  
343 numbers of regulated genes were merely different, the nature and expression patterns were  
344 significantly variable. Majority of genes induced by chIFN- $\lambda$  were also only weakly induced by  
345 chIFN- $\gamma$ , however, a limited number of gene were equally induced by both chIFN- $\lambda$  and chIFN- $\gamma$   
346 (Supplementary table 1, Figure 4C). Similar to the comparison of type I and type II, the pairwise  
347 scattering plot showed a range of distinctive expression patterns in ISGs that were induced by chIFN- $\lambda$   
348 and chIFN- $\gamma$  (Figure 4D).

349

Fig. 4

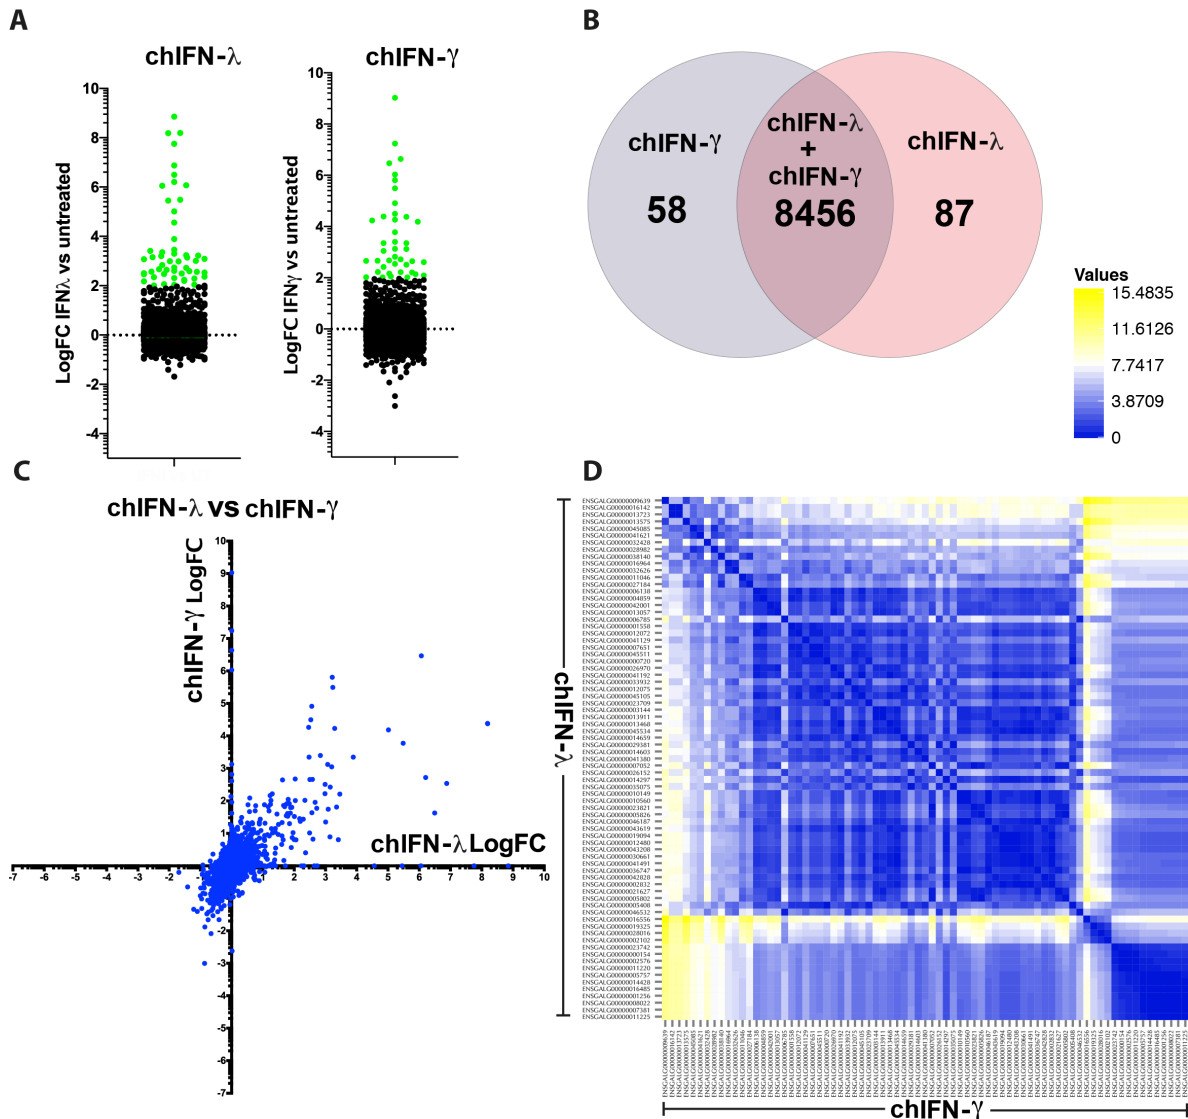

350

351

352 **Figure 4.** Comparative induction of ISGs by type II and type III IFNs. **(A)** Comparison of significantly (coloured green)

353 up or down-regulation for ISGs by chIFN- $\lambda$  and chIFN- $\gamma$ . **(B)** A total of 58 ISGs were significantly and

354 differentially regulated by chIFN- $\gamma$  compared to 87 genes induced by chIFN- $\lambda$ . Both IFNs shared a great number

355 of genes that were expressed and mapped to the annotated genome of the chicken ( $n=8456$ ). **(C)** Difference

356 between the chIFN- $\lambda$  and chIFN- $\gamma$  induced genes revealing that majority of ISGs induced by chIFN- $\lambda$  were

357 weakly induced by chIFN- $\gamma$ , however, there were a number of gene were equally induced by both chIFN- $\lambda$  and

358 chIFN- $\gamma$ . **(D)** Pairwise scattering plot analysis showed a range of expression patterns in ISGs that were induced

359 by chIFN- $\lambda$  and chIFN- $\gamma$  further indicating the difference in expression patterns.

360

### 361 3.6. Global and Differential Induction of ISGs by Chicken IFNs

362 Individual and combined analysis of genes induced by either type I or II or III IFNs concluded that

363 each cytokine induced a range of genes in a cell line that express receptors for all types of IFNs

364 (Figure 5A). However, the genetic and expression levels varied among genes that were induced by

365 more than one IFN. While a large number of genes were insignificantly and ubiquitously expressed  
366 (n=8433), a range of commonalities and uniqueness in the expression dynamics was observed  
367 (Figure 5B). The Venn diagram of ISGs regulated by type I, II and III IFNs revealed majority of  
368 IFN-specific genes were expressed by the chIFN- $\gamma$  followed by chIFN- $\lambda$  and chIFN- $\alpha$ . However, as  
369 expected, the largest set of ISGs (n=50) was shared by the chIFN- $\lambda$  and chIFN- $\alpha$  and the number of  
370 shared ISGs between type II and type III and type I and II were 23 and 15, respectively (Figure 5B).

371

372 Cumulative scatter plot analysis of genes between chIFN- $\lambda$  and chIFN- $\alpha$ , and chIFN- $\gamma$  and chIFN- $\alpha$   
373 highlighted genes of overlapping and distinctive expression patterns. The genes that were  
374 up-regulated ranged from transcription factors, nuclear receptors and host antiviral factors. However,  
375 these genes were predominantly presented by the ISG including DDX60, OASL, Mx1, IFI6, IFIT5,  
376 LY6E, TMEM173 among others (Figure 5C). While the down-regulated genes were lower in  
377 numbers, transcription of genes such as PIGY, FADS and TNFAIP6 were unanimously suppressed  
378 by IFNs in chicken fibroblasts (Supplementary table 2). The clustering heat map, directly comparing  
379 selecting unregulated genes among chIFN- $\alpha$ , chIFN- $\gamma$  and chIFN- $\lambda$ , indicated a distribution of a set  
380 of genes across the spectrum. This heat map articulated a less-extensive expression divergence  
381 between genes of type I and type III IFNs, whereas the nature of type II IFN-mediated genes showed  
382 a higher divergence with the genes induced by the rest of IFNs (Figure 5D). Altogether, this data  
383 highlight commonalities and fundamental differences in the potential signalling cascades that drive  
384 the expression of ISGs.

385

Fig. 5

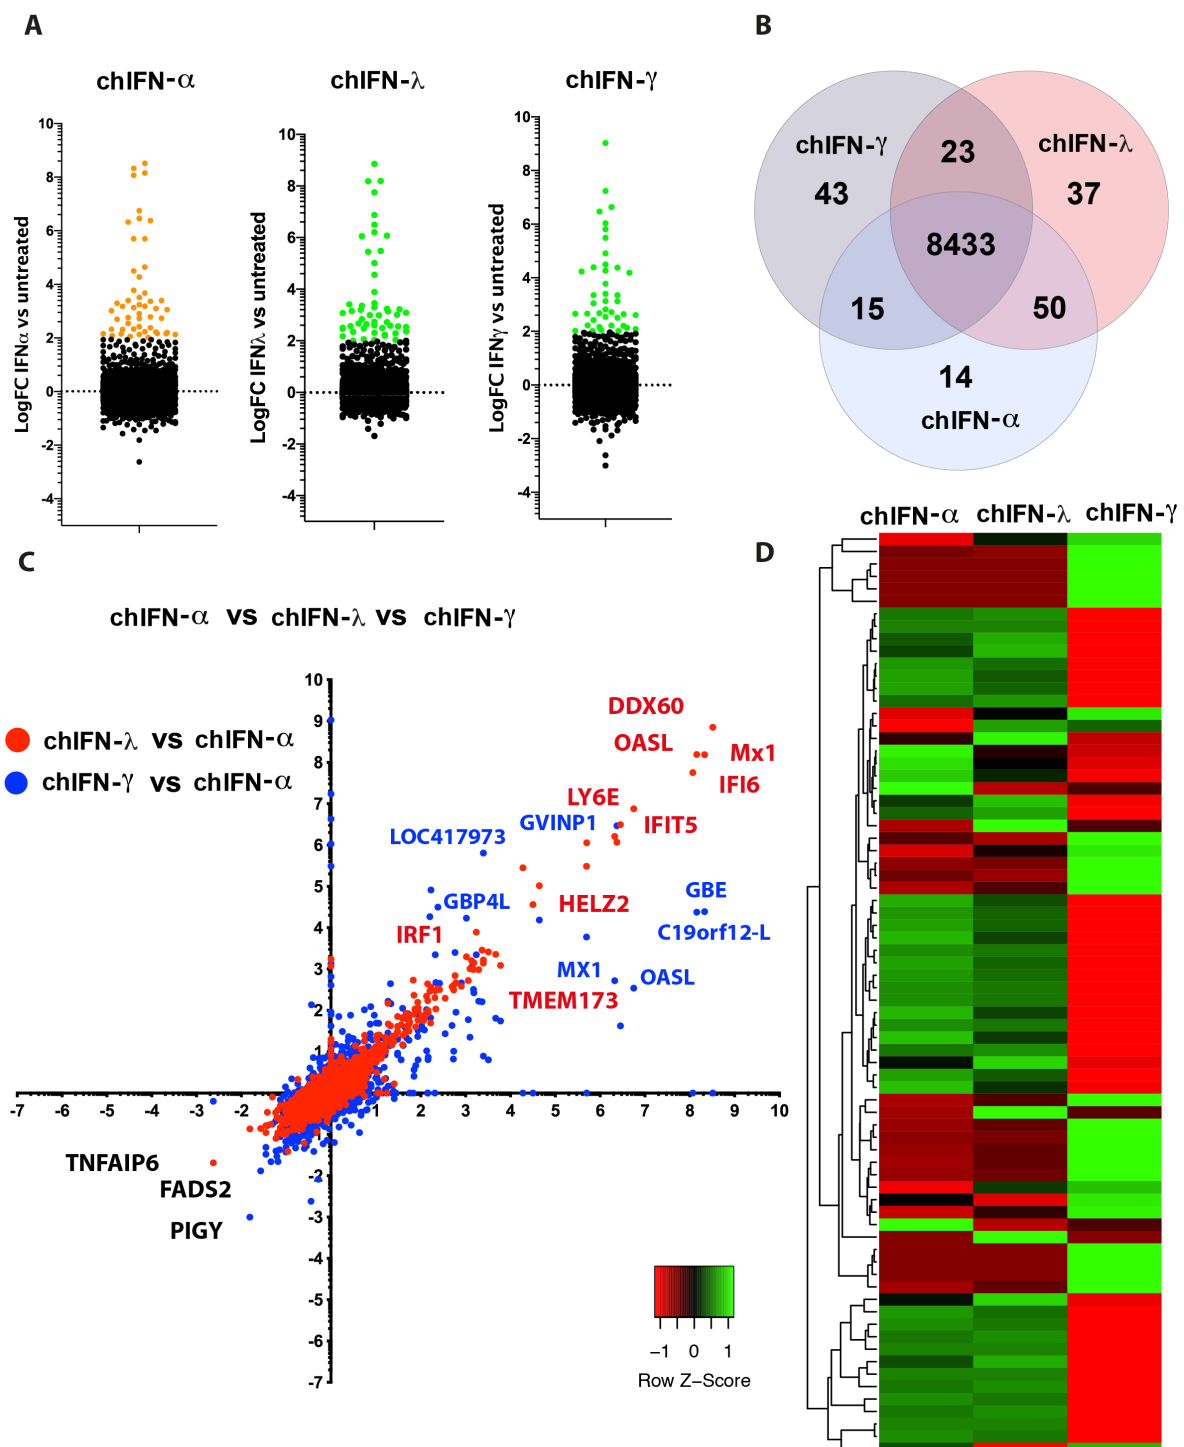

386

387

388

389

390

391

392

393

394

**Figure 5.** Genome-scale comparative analysis of ISGs induced by either type I or II or III. **(A)** Each IFN induced a range of genes in a cell line that express receptors for all types of IFNs. **(B)** The Venn diagram of ISGs regulated by type I, II and III IFNs revealed the largest set of ISGs ( $n=50$ ) were shared by the chIFN- $\lambda$  and chIFN- $\alpha$  while the number of shared ISGs between type II and type III and type I and II were 23 and 15, respectively. **(C)** Cumulative scatter plot analysis of ISGs between chIFN- $\lambda$  and chIFN- $\alpha$ , and chIFN- $\gamma$  and chIFN- $\alpha$  highlighted genes of overlapping and distinctive expression patterns. The prominent up-regulated and down-regulated are labelled and colour-coded. **(D)** Heat map to compare the selected un-regulated ISGs induced by chIFN- $\alpha$ , chIFN- $\gamma$  and chIFN- $\lambda$  indicates less-extensive expression divergence between genes of

395 type I and type III IFNs, whereas the nature of type II IFN-mediated genes showed a higher divergence with the  
396 genes induced by the rest of IFNs.

397

### 398 3.7. Promoter *in trans* Analysis of Differentially Regulated ISGs

399 The direct comparative analysis of significantly regulated genes showed a high-level of synergy  
400 between  $\text{chIFN-}\alpha$  and  $\text{chIFN-}\gamma$  in both up- and down-regulated genes where PIGY was the most  
401 down-regulated and DDX60 was the most up-regulated gene (Figure 6A). However, both up- and  
402 down-regulated genes were substantially different between type I and II, and type II and type III  
403 IFNs-stimulated genes. This differential and IFN-dependent expression of ISGs is mainly attributed  
404 to the promoter of the genes [2,3]. Next, we scanned the chicken genome for the presence of ISRE  
405 and GAS elements in top regulated genes and identified that highly regulated genes carried GAS  
406 element in abundance compared to the ISRE in an IFN-independent manner (Table 1,  
407 Supplementary table 3). The sequence of ISRE and GAS varied among genes induced by IFNs  
408 where GAS element was identified in type I and type III ISGs and even the ISRE was detected in the  
409 promoter of genes induced by type II IFNs with a consensus sequence shown in the Figure 6B and  
410 6C for ISRE and GAS, respectively.

411

412 **Table 1.** Number of ISRE and/or GAS in selected ISGs

| Gene name    | Inducible by*       | GAS | ISRE |
|--------------|---------------------|-----|------|
| DDX60        | Type I and III IFNs | 17  | 0    |
| MX1          | Type I and III IFNs | 9   | 2    |
| IFI6         | Type I and III IFNs | 7   | 3    |
| LY6E         | Type I and III IFNs | 5   | 2    |
| IFI35        | Type III IFN        | 7   | 0    |
| STAT2        | Type III IFN        | 1   | 0    |
| IFI27L2      | Type III IFN        | 7   | 0    |
| ACKR4        | Type II IFN         | 9   | 0    |
| NLRC5        | Type II IFN         | 2   | 2    |
| GBE          | Type II IFN         | 13  | 0    |
| LOC112533211 | Type II IFN         | 6   | 0    |

413 \*based on the transcriptomics data in this study

414

415 In order to demonstrate that *in silico* predicted ISRE and GAS respond to IFNs, we generated a  
416 luciferase reporter system using wild type promoter of  $\text{chIFIT5}$ , which is one of the highly regulated  
417 genes both transcriptionally and translationally in chicken [3]. The promoter sequence of the  $\text{chIFIT5}$   
418 contained two putative ISREs, a GAS and six GAAANN elements, which are hallmarks motifs for  
419 IFN-responsiveness (Figure 6D). This entire cassette was cloned upstream to luciferase reported  
420 gene and was used to monitor the expression of the gene in cells primed individually with  $\text{chIFN-}\alpha$ ,  
421  $\text{chIFN-}\lambda$  or  $\text{chIFN-}\gamma$ . Fold change induction, compared to mock-primed cells, showed a substantial  
422 stimulation of reporter gene transcription by all type I, III and II IFNs (Figure 6E). Finally, we verified  
423 the RNA-seq based expression of top six ISGs using qPCR as we described before [3], and the fold  
424 change of all these ISGs aligned with the level of induction observed in transcriptomes (Figure 6F).

Fig. 6

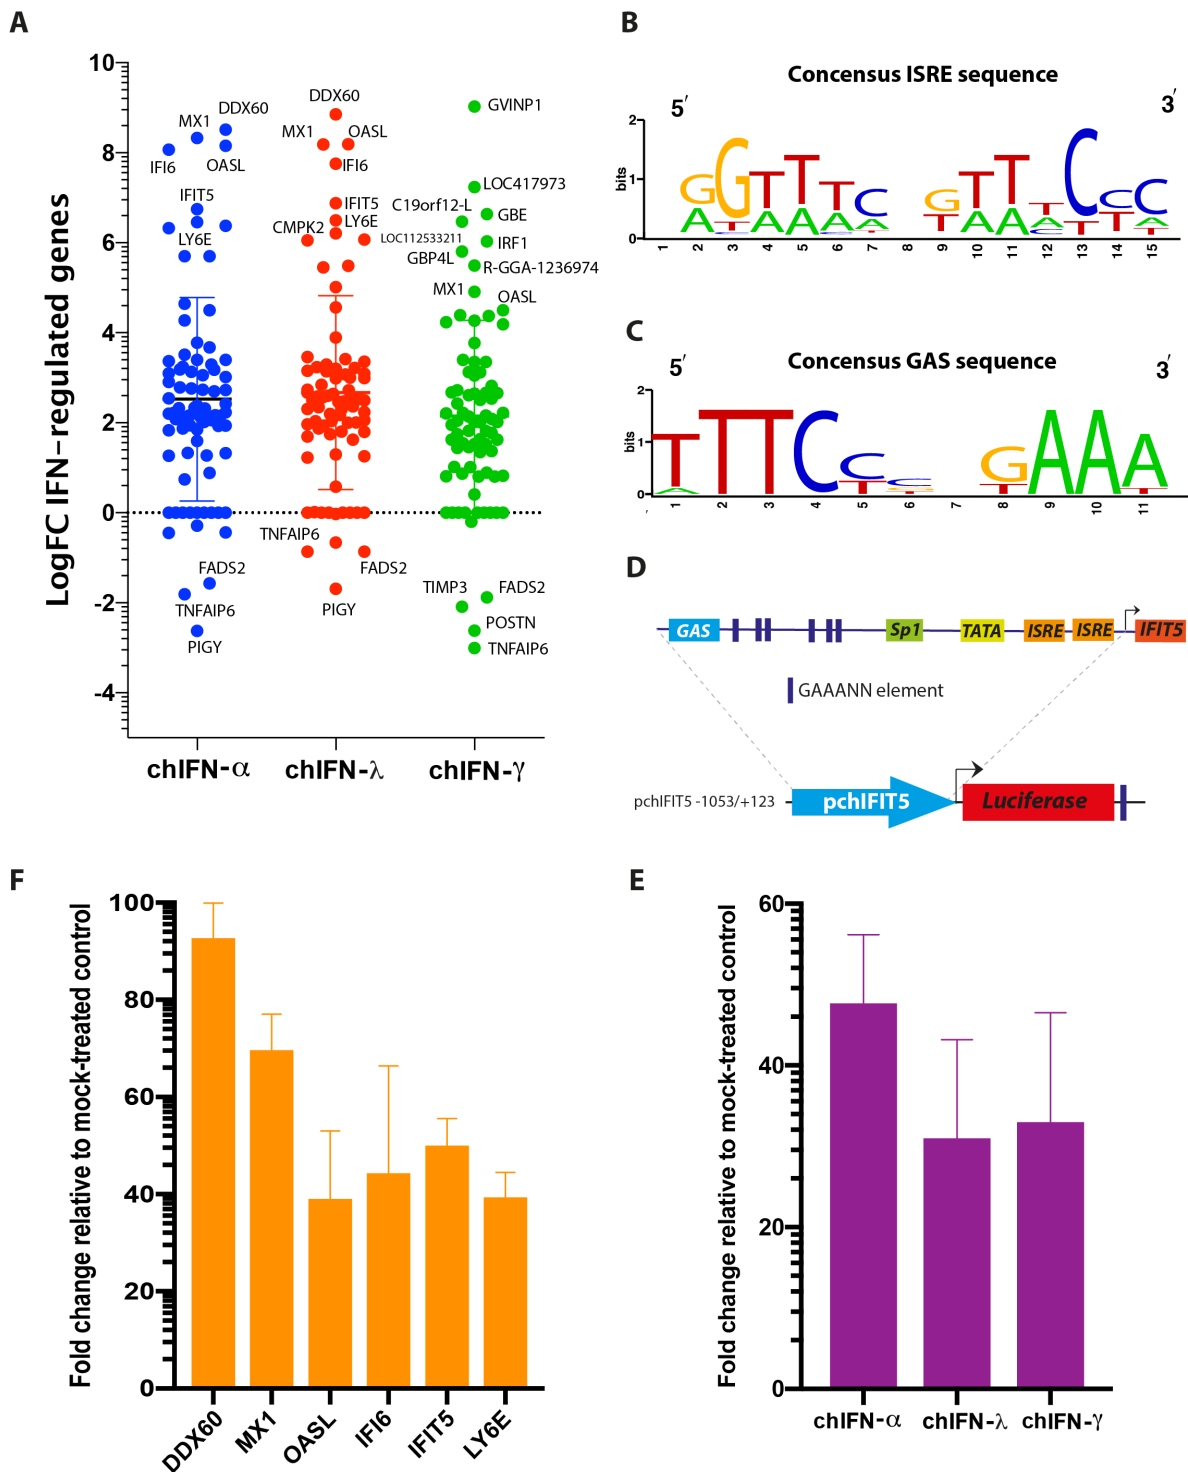

425

426

427

428

429

430

431

432

**Figure 6.** Expression of genes individually regulated by type I, II and III IFNs and their association with GAS and ISRE elements in the promoter region. **(A)** Direct comparative analysis of significantly regulated ISGs showed a high-level synergy between chIFN- $\alpha$  and chIFN- $\gamma$  in both up- and down-regulated genes; DDX60 was the most up-regulated gene while PIGY was the most down-regulated. ISRE **(B)** and GAS **(C)** consensus sequence in the most up-regulated ISGs. **(D)** The promoter sequence of chIFIT5 (pchIFIT5) contained two putative ISREs, a GAS and six GAAANN elements. **(E)** The chIL28RA DF-1 cells were transfected with pchIFIT5 and stimulated with chIFN- $\alpha$ , chIFN- $\gamma$  or chIFN- $\lambda$ . The fold change induction in the luciferase genes compared to mock-primed



433 cells is plotted. A substantial stimulation of reporter gene transcription by all type I, II and III IFNs was observed.  
434 (F) Fold change induction of significantly up-regulated ISGs using qPCR.

#### 435 **4. Discussion**

436 Interferons were first described in “chicken” when Isaacs and Lindenmann noticed that supernatant  
437 from virus-infected cells can “interfere” with the replication of influenza virus [29]. However, vast  
438 majority of information on the nature of IFNs regulated and IFN-pathways in chicken is derived from  
439 studies conducted in human and mice. Moreover, substantial differences in several innate immune  
440 checkpoints have been observed in chickens, which highlight fundamental and evolutionary distinct  
441 mechanisms in birds especially in chickens [3]. Thus, understanding mechanisms and gaining  
442 insights into additional compensatory mechanisms in IFN-mediated establishment of antiviral state in  
443 chicken would provide foundations to underpin diversity and dynamics of innate immunity in animals.

444

445 Since ISGs play the most dynamic and versatile roles in inhibiting viruses at multiple scales, genetic  
446 annotation of these genes is essential to perform large-scale functional studies and to reveals  
447 functional plasticity of ISGs. While information in mammals, especially in human and mice, has  
448 started to expand in unraveling the roles of ISGs, studies have proposed the expression of ISGs both  
449 *in vitro* [30] and *in vivo* [18] in chicken; however, this information is only limited to type I IFNs or to a  
450 limited set of type III IFNs [31]. At system and cellular levels, IFNs and their regulated genes function  
451 in a network and thus necessitate the exploration of these components at the genome-wide scale.  
452 Moreover, mapping and cataloguing genes that are specific to type I, II or III IFNs or identifying  
453 genes that span the responses against pan-IFN levels would provide foundation to functional  
454 investigations against viruses of birds.

455

456 Building upon existing information on chicken ISGs [18,30,32] and our recent studies [3, 33], we  
457 compared the expression of the genes, which are induced by either  $\text{chIFN-}\alpha$ ,  $\text{chIFN-}\lambda$  or  $\text{chIFN-}\gamma$  and  
458 catalogue the genes which are IFN-specific or genes that are shared between different types of IFNs  
459 in chicken. Since IFNs show cell and tissue-specific actions [8], which are mainly attributed to their  
460 cognate expression patterns [28], we attempted to establish a model system that could reliably  
461 respond to all type of IFNs. The chicken fibroblast (DF-1), one of the most characterized cell lines in  
462 avian research, was selected. However, due to repressive expression of  $\text{chIFN-}\lambda$  receptors [28], the  
463 treatment of DF1 with type III IFN showed defective genes inductions, IFN-promoter activation and  
464 cumulatively established an antiviral state against IFN-sensitive virus (VSV). We thus exploited a  
465 permanent DF1 cell line that exogenously express  $\text{chIFN-}\lambda$  receptors and thus revised the full  
466 responsiveness to type III as well as other IFNs. We propose this as an improved tool to study  
467 genome-scale ISGs induced by multiple stimuli and regulated by a complex cellular network.

468

469 Using genome-scale transcriptomes in chicken fibroblasts, we enlisted genes that were IFN-specific  
470 or were generic. The overall numbers of genes that were either up- or down-regulated were lower  
471 compared to previous studies which were performed on primary [17] or established cell lines or *in*  
472 *vivo* [18]. We reasoned that since we applied stringent-selection and fold-induction criteria in a cell  
473 line that could induce simultaneous responses, the overall gene transcription was weaker. Moreover,  
474 the *in vitro* experimental setting would differ from a naturally occurring infection where more potent  
475 local type I IFNs are activated soon after viral infections (or other stimuli) which then expand to

476 system with the release of several cytokines and other effectors simultaneously [34]. However,  
477 significantly up- or down-regulated genes in our study were known IFN-stimulated (e.g. ISGs).  
478 Moreover, *chIFIT5*, which we have previously identified and characterized [3], showed higher  
479 expression in type I and type III-treated chicken fibroblasts. Additionally, owing to the fact that  
480 different cells are known to respond IFNs differently [4] and that ISGs express temporally depending  
481 on the nature of stimuli [18], gauging the expression dynamics at different time points with both viral  
482 and IFNs stimulated cell would provide complete picture in future.

483

484 The direct comparison of all ISGs regulated by type I, II and III in heatmap and scatter plots indicated  
485 that the effects of *chIFN- $\alpha$*  and *chIFN- $\lambda$*  on the expression of ISGs were distinctive from the genes  
486 expressed in *chIFN- $\gamma$* -stimulated cells. As anticipated, a higher resolution analysis indicated that the  
487 differentially expressed genes included a list of known genes such as *IFIT5*, *Mx1*, *OASL* further  
488 supporting the reliability of experimental approach and suitability of the model. However, as Roll et  
489 al. 2018 [18] have highlighted it, yet poor annotation of the chicken genome may lead to either false  
490 gene annotation or lack of gene assembly results in missed genes in the list of otherwise  
491 IFN-stimulated genes.

492

493 During the analysis of IFN-mediated gene expression, it was revealed that up-regulated genes were  
494 predominantly presented over the down-regulated genes in all tested type I, II and III IFNs. It was  
495 only *PIGY* (phosphatidylinositol glycan anchor biosynthesis) that was significantly down regulated by  
496 the type I IFN and three genes named *TNFAIP6* (Tumor Necrosis Factor-Inducible Gene 6 Protein),  
497 *POSTN* (Periostin) and *TIMP3* (TIMP Metalloproteinase Inhibitor 3) were down regulated by the type  
498 II IFNs. One plausible rationale for higher number of upregulated genes is the trait of all IFNs and is  
499 supported by the presence of ISRE and GAS elements in majority of analysed ISGs. Analysis of  
500 highly expressed ISGs in different IFN-treated lists revealed presence of a number of ISRE and GAS  
501 motifs. Intriguingly and in contrast to human promoter sequences [27], a large number of GAS  
502 sequences were identified compared to ISRE motifs in chicken ISGs. Comparing these motifs with  
503 the nature of treated IFNs, no correlation was observed; all types of IFN-regulated genes carried  
504 both ISRE and GAS elements. While we demonstrated that chicken IFNs transcriptionally induced a  
505 reporter gene through GAS and ISRE in an IFN-independent manner, it requires future experimental  
506 studies to identify the biological relevance of *in silico* predicted motifs with the functional relevance.  
507 The transcriptomes and individual reports on ISGs could not clearly distinguish between primary  
508 (direct IFN-dependents) and secondary (positive loop feedback of IFNs) responses, thus impeding a  
509 clear differentiation of genes expressions that are specific to each of these stimuli. Moreover,  
510 majority of functional studies have focused on the up-regulated genes, the potential anti- or pro-viral  
511 roles of under-expressed genes would shed lights on the dynamics and plasticity of IFN regulated  
512 genes.

513

514 Owing to the fact that ISGs play fundamental roles in a wide range of cellular activities including  
515 transcriptional and translational regulation of immune responses [35,35] and establishing a host  
516 antiviral state against viruses, the provided data would lay foundations to investigate functions of  
517 these important and complex domains of host-pathogen interactions using large-scale screening

518 platforms. This comprehensive information is first of its kind to compare genes that are differentially  
519 regulated by type I, II and type III IFNs in chicken.

520

521 **Funding:** This study was funded by the Biotechnology and Biological Sciences Research Council  
522 (BBSRC) (BB/M008681/1 and BBS/E/I/00001852) and British Council (172710323 and 332228521).

523

524 **Acknowledgments:** We appreciate the kind gift of pchMx-luc by Nicolas Ruggli, Switzerland, and  
525 VSV-GFP and chIL28RA DF-1 by Dennis Rubbenstroth, Institut für Virologie, Universitätsklinikum  
526 Freiburg, Germany.

527

528 **Conflicts of Interest:** The authors declare no financial or non-financial competing interests. The  
529 funders had no role in the design of the study; in the collection, analyses, or interpretation of data; in  
530 the writing of the manuscript, or in the decision to publish the results.

### 531 **Data Availability**

532 The data generated in this study were submitted in the Bioproject database under ID: PRJNA678234  
533 and PRJNA678244.

534

### 535 **References**

- 536 1. Pestka, S.; Krause, C.D.; Walter, M.R. Interferons, interferon-like cytokines, and their  
537 receptors. *Immunol. Rev.* **2004**, *202*, 8-32.
- 538 2. Santhakumar, D.; Rubbenstroth, D.; Martinez-Sobrido, L.; Munir, M. Avian Interferons and  
539 Their Antiviral Effectors. *Front. Immunol.* **2017a**, *8*:49.
- 540 3. Santhakumar, D.; Rohaim, M.A.S.; Hussein, H.A.; Hawes, P.; Ferreira, H.L.; Behboudi, S.;  
541 Iqbal, M.; Nair, V.; Arns, C.W.; Munir, M. Chicken Interferon-induced Protein with  
542 Tetratricopeptide Repeats 5 Antagonizes Replication of RNA Viruses. *Sci. Rep.* **2018**, *8*(1):  
543 6794.
- 544 4. Santhakumar, D.; Iqbal, M.; Nair, V.; Munir, M. Chicken IFN Kappa: A Novel Cytokine with  
545 Antiviral Activities. *Sci. Rep.* **2017b**, *7*(1): 2719.
- 546 5. Fensterl, V.; Sen, G.C. Interferons and viral infections. *Biofactors* 2009, *35*(1):14–20.
- 547 6. Lazear, H.M.; Schoggins, J.W.; Diamond, M.S. Shared and Distinct Functions of Type I and  
548 Type III Interferons. *Immunity* **2019**, *50*(4):907-923.
- 549 7. Randall, R.E.; Goodbourn, S. Interferons and viruses: an interplay between induction,  
550 signalling, antiviral responses and virus countermeasures. *J. Gen. Virol.* **2008**, *89*, 1–47.
- 551 8. Kessler, D.S., Veals, S.A., Fu, X.Y.; Levy, D.E. Interferon-alpha regulates nuclear  
552 translocation and DNA-binding affinity of ISGF3, a multimeric transcriptional activator.  
553 *Genes. Dev.* **1990**, *4*(10): 1753–65.
- 554 9. Schoggins, J.W. Recent advances in antiviral interferon stimulated gene biology.  
555 *F1000Res.* **2018**, *7*:309.
- 556 10. Schoggins, J.W.; Rice, C.M. Interferon-stimulated genes and their antiviral effector  
557 functions. *Curr. Opin. Virol.* **2011a**, *1*(6):519–25.
- 558 11. Schoggins, J.W.; Wilson, S.J.; Panis, M.; Murphy, M.Y.; Jones, C.T.; Bieniasz, P.; Rice,  
559 C.M. A diverse range of gene products are effectors of the type I interferon antiviral  
560 response. *Nature.* **2011b**, *472*(7344): 481–5.

- 561 12. Ramos, I.; Smith, G.; Ruf-Zamojski, F.; Martínez-Romero, C.; Fribourg, M.; Carbajal,  
562 E.A.; Hartmann, B.M.; Nair, V.D.; Marjanovic, N.; et al. Innate Immune Response to  
563 Influenza Virus at Single-Cell Resolution in Human Epithelial Cells Revealed Paracrine  
564 Induction of Interferon Lambda. *J. Virol.* **2019**, 90: 20, e00559-19.
- 565 13. USDA. Available from:  
566 [www.aphis.usda.gov/aphis/ourfocus/animalhealth/animal-disease-information/avian-influen](http://www.aphis.usda.gov/aphis/ourfocus/animalhealth/animal-disease-information/avian-influenza-disease/ct-avian-influenza-disease)  
567 [za-disease/ct-avian-influenza-disease](http://www.aphis.usda.gov/aphis/ourfocus/animalhealth/animal-disease-information/avian-influenza-disease/ct-avian-influenza-disease)
- 568 14. Uchikawa, E.; Lethier, M.; Malet, H.; Brunel, J.; Gerlier, D.; Cusack, S. Structural analysis of  
569 dsRNA binding to anti-viral pattern recognition receptors LGP2 and MDA5. *Mol. Cell.* **2016**,  
570 62(4):586–602.
- 571 15. Karpala, A.J.; Bingham, J.; Schat, K.A.; Chen, L.M.; Donis, R.O.; Lowenthal, J.W.; Bean,  
572 A.G. Highly pathogenic (H5N1) avian influenza induces an inflammatory T helper type 1  
573 cytokine response in the chicken. *J. Interferon. Cytokine. Res.* **2011**, 31(4):393-400.
- 574 16. Liniger, M.; Summerfield, A.; Zimmer, G.; McCullough, K.C.; Ruggli, N. Chicken cells sense  
575 influenza A virus infection through MDA5 and CARDIF signaling involving LGP2. *J. Virol.*  
576 **2012**, 86(2):705-17.
- 577 17. Giotis, E.S.; Robey, R.C.; Skinner, N.G.; Tomlinson, C.D.; Goodbourn, S.; Skinner, M.A.  
578 Chicken interferome: avian interferon-stimulated genes identified by microarray and  
579 RNA-seq of primary chick embryo fibroblasts treated with a chicken type I interferon (IFN- $\alpha$ ).  
580 *Vet. Res.* **2016**, 47(1):75.
- 581 18. Roll, S.; Hartle, S.; Lutteke, T.; Kaspers, B.; Hartle, S. Tissue and time specific expression  
582 pattern of interferon regulated genes in the chicken. *BMC Genomics* **2017**, 18, 264.
- 583 19. Berger Rentsch, M.; Zimmer, G. A vesicular stomatitis virus replicon-based bioassay for the  
584 rapid and sensitive determination of multi-species type I interferon. *PLoS One.* **2011**, 6,  
585 e25858.
- 586 20. Bolger, A.M.; Lohse, M.; Usadel, B. Trimmomatic:  
587 a flexible trimmer for Illumina sequence data. *Bioinformatics.* **2014**, 30(15): 2114-20.
- 588 21. Dobin, A.; Davis, C.A.; Schlesinger, F.; Drenkow, J.; Zaleski, C.; Jha, S.; Batut,  
589 P.; Chaisson, M.; Gingeras, T. R. STAR: ultrafast universal RNA-seq aligner. *Bioinformatics*,  
590 **2013**, 29(1): 15–21.
- 591 22. Robinson, M.D.; McCarthy, D.J.; Smyth, G.K. edgeR:  
592 a Bioconductor package for differential expression analysis of digital gene expression data.  
593 *Bioinformatics.* **2010**, 26(1): 139–140.
- 594 23. Li, W.; Freudenberg, J.; Suh, Y.J.; Yang, Y. Using volcano plots and regularized-chi  
595 statistics in genetic association studies. *Computational Biology and Chemistry.* **2014**, 48:  
596 77–83.
- 597 24. Subhash, S.; Kanduri, C. GeneSCF: a real-time based functional enrichment tool with  
598 support for multiple organisms. *BMC Bioinformatics.* **2016**, 17(1):365.
- 599 25. Anders, S.; Reyes, A.; Huber, W. Detecting differential usage of exons from RNA-seq data.  
600 *Genome Res.* **2012**, 22(10): 2008-17.
- 601 26. Schumacher, B.; Bernasconi, D.; Schultz, U.; Staeheli, P. The chicken Mx promoter contains  
602 an ISRE motif and confers interferon inducibility to a reporter gene in chick and monkey  
603 cells. *Virology.* **1994**, 203(1):144-8.

- 604 27. Tsukahara, T.; Kim, S.; Taylor, M.W. REFINEMENT: a search framework for the  
605 identification of interferon-responsive elements in DNA sequences--a case study with ISRE  
606 and GAS. *Comput. Biol. Chem.* **2006**, 30(2):134–47.
- 607 28. Reuter, A.; Soubies, S.; Härtle, S.; Schusser, B.; Kaspers, B.; Staeheli, P.; Rubbenstroth, D.  
608 Antiviral activity of lambda interferon in chickens. *J. Virol.* **2014**, 88(5):2835–43.
- 609 29. Isaacs, A.; Lindenmann, J. Virus interference. I. The interferon. *Proc. R. Soc. Lond. Ser. B*  
610 *Biol. Sci.* **1957**, 147, 258–267.
- 611 30. Giotis, E.S.; Ross, C.S.; Robey, R.;C.; Nohturfft, A.; Goodbourn, S.; Skinner, M.A.  
612 Constitutively elevated levels of SOCS1 suppress innate responses in DF-1 immortalised  
613 chicken fibroblast cells. *Sci. Rep.* **2017**, 7(1):17485.
- 614 31. Masuda, Y.; Matsuda, A.; Usui, T.; Sugai, T.; Asano, A.; Yamano, Y. Biological effects of  
615 chicken type III interferon on expression of interferon-stimulated genes in chickens:  
616 comparison with type I and type II interferons. *J. Vet. Med. Sci.* **2012**, 74, 1381-1386.
- 617 32. Xie, T.; Chen, T.; Li, C.; Wang, W.; Cao, L.; Rao, H.; Yang, Q.; Shu, H.B.; Xu, L.G. RACK1  
618 attenuates RLR antiviral signaling by targeting VISA-TRAF complexes. *Biochem Biophys*  
619 *Res Commun.* **2019**, 508(3):667-674.
- 620 33. Arslan, M.; Yang, X.; Santhakumar, D.; Liu, X.; Hu, X.; Munir, M.; Li, Y.; Zhang, Z. Dynamic  
621 Expression of Interferon Lambda Regulated Genes in Primary Fibroblasts and Immune  
622 Organs of the Chicken. *Genes (Basel).* **2019**, 10(2). pii: E145.
- 623 34. Penski, N.; Penski, N.; Härtle, S.; Rubbenstroth, D.; Krohmann, C.; Ruggli, N.; Schusser,  
624 B.; Pfann, M.; Reuter, A.; Gohrbandt, S.; et al. Highly pathogenic avian influenza viruses do  
625 not inhibit interferon synthesis in infected chickens but can override the interferon-induced  
626 antiviral state. *J. Virol.* **2011**, 85(15):7730-41.
- 627 35. de Veer, M.J.; Holko, M.; Frevel, M.; Walker, E.; Der, S.; Paranjape, J.M.; Silverman,  
628 R.H.; Williams, B.R. Functional classification of interferon-stimulated genes identified using  
629 microarrays. *J. Leukoc. Biol.* **2001**, 69 (6):912–20.
- 630 36. To, K.K.; Lau, C.C.; Woo, P.C.; Lau, S.K.; Chan, J.F.; Chan, K.H.; Zhang, A.J.; Chen,  
631 H.; Yuen, K.Y. Human H7N9 virus induces a more pronounced pro-inflammatory cytokine  
632 but an attenuated interferon response in human bronchial epithelial cells when compared  
633 with an epidemiologically-linked chicken H7N9 virus. *Virology*. **2016**, 13:42 (2016)
